# Supplementary material
Source: PubMed Central journal article supplement (PMC2662558)

## Supplemental Methods

### *Intimal Medial Thickness (IMT) analyses*

Participants were from the Offspring Cohort of the Framingham Heart Study (FHS) who had IMT measurement data and were successfully genotyped for the Asn396Ser or Thr111Ile *LIPG* variant, with up to 1653 participants analyzed. We analyzed the mean and maximum common carotid artery IMT and internal carotid artery IMT measurements as previously described, creating ranked normalized deviates from the age-adjusted, sex-specific residuals obtained from a linear regression model (1). The additive genetic associations of the *LIPG* variants were evaluated.

## Supplemental References

1. O'Donnell, C., Cupples, L.A., D'Agostino, R., Fox, C., Hoffmann, U., Hwang, S.-J., Ingelsson, E., Liu, C., Murabito, J., Polak, J., et al. 2007. Genome-wide association study for subclinical atherosclerosis in major arterial territories in the NHLBI's Framingham Heart Study. *BMC Medical Genetics* 8:S4.

Supplemental Table 1. Fasting lipid and lipoprotein measurements of high HDL subjects in whom *LIPG* was resequenced.

| Variant              | Sex | Age (y) | BMI (kg/m <sup>2</sup> ) | Alcohol (%) | Smoker (%) | HDL (mg/dl) | cLDL (mg/dl) | TC (mg/dl) | TG (mg/dl) | Apo A-I (mg/dl) | Apo B (mg/dl) | Lp(a) (mg/dl) |
|----------------------|-----|---------|--------------------------|-------------|------------|-------------|--------------|------------|------------|-----------------|---------------|---------------|
| Fs114delA            | F   | 57      | 24.6                     | 0           | 0          | 121         | 160          | 298        | 85         | 207             | 93            | 13            |
| Ala116Thr            | F   | 57      | -                        | -           | -          | 124         | 115.4        | 253        | 68         | 299             | 66            | 54.1          |
| Gly176Arg            | F   | 66      | 22.9                     | 1           | 0          | 129         | 152          | 292        | 57         | 230             | 117           | 46            |
| Ile239Thr            | F   | 57      | 21.0                     | 0           | 0          | 113         | 212.4        | 340        | 73         | 214             | 122           | 100.2         |
| Met342Val            | F   | 48      | 21.3                     | 1           | 1          | 141         | 78.6         | 245        | 127        | 301             | 54            | 46.8          |
| Arg476Trp            | F   | 59      | 24.2                     | 1           | 0          | 129         | 169          | 313        | 74         | 230             | 107           | 82.8          |
| Arg476Trp            | F   | 35      | 21.3                     | 1           | 1          | 101         | 130          | 251        | 98         | 254             | 129           | >3            |
| Arg476Trp            | F   | 53      | 18.7                     | 1           | 0          | 111         | 203          | 326        | 58         | 182             | 114           | >3            |
| Arg476Trp            | F   | 40      | 24.2                     | 0           | 0          | 98          | 209          | 345        | 190        | 187             | 160           | 17            |
| X501Arg <sup>A</sup> | F   | 56      | 22.5                     | 1           | 0          | 102         | 118.6        | 233        | 62         | 234             | 78            | 51.0          |

|                       |      |                          |                             |      |     |                            |                            |                             |                           |                             |                            |                           |
|-----------------------|------|--------------------------|-----------------------------|------|-----|----------------------------|----------------------------|-----------------------------|---------------------------|-----------------------------|----------------------------|---------------------------|
| Asn396Ser<br>(n = 23) | 65.2 | 54.2 ± 13.8<br>(31 - 80) | 23.0 ± 3.2<br>(18.8 - 32.0) | 69.6 | 4.3 | 102.9 ± 20.8<br>(73 - 174) | 125.1 ± 41.2<br>(52 - 199) | 244.1 ± 43.1<br>(161 - 315) | 80.7 ± 50.3<br>(27 - 290) | 188.5 ± 27.0<br>(151 - 234) | 111.0 ± 26.4<br>(78 - 151) | 73.6 ± 66.9<br>(<3 - 176) |
|-----------------------|------|--------------------------|-----------------------------|------|-----|----------------------------|----------------------------|-----------------------------|---------------------------|-----------------------------|----------------------------|---------------------------|

|                 |      |                          |                             |      |     |                            |                            |                             |                           |                            |                           |                             |
|-----------------|------|--------------------------|-----------------------------|------|-----|----------------------------|----------------------------|-----------------------------|---------------------------|----------------------------|---------------------------|-----------------------------|
| WT<br>(n = 340) | 60.0 | 59.9 ± 11.5<br>(27 - 89) | 23.5 ± 3.3<br>(15.8 - 37.4) | 89.8 | 9.4 | 102.6 ± 20.0<br>(68 - 186) | 124.6 ± 33.7<br>(36 - 248) | 243.6 ± 38.9<br>(136 - 397) | 75.5 ± 32.8<br>(27 - 260) | 206.7 ± 40.8<br>(36 - 312) | 81.9 ± 17.9<br>(52 - 149) | 38.8 ± 37.3<br>(<3 - 135.9) |
|-----------------|------|--------------------------|-----------------------------|------|-----|----------------------------|----------------------------|-----------------------------|---------------------------|----------------------------|---------------------------|-----------------------------|

<sup>A</sup>The subject carrying the X501Arg variant also carries the Asn396Ser variant. Values with '±' are means ± SD. -, data unavailable. Numbers in parentheses are ranges.

Supplemental Table 2. Additional lipoprotein measurement and NMR lipoprotein profile measurements.

| Variant              | ApoCIII<br>mg/dl | Apo E<br>mg/dl | Apo CII<br>mg/dl | Apo AII<br>mg/dl | VLDL & Chylomicron Particles (total)<br>nmol/L | Large VLDL & Chylomicron Particles<br>nmol/L | Medium VLDL Particles<br>nmol/L | Small VLDL Particles<br>nmol/L | LDL Particles (total)<br>nmol/L | IDL Particles<br>nmol/L | Large LDL Particles<br>nmol/L | Small LDL Particles (total)<br>nmol/L |
|----------------------|------------------|----------------|------------------|------------------|------------------------------------------------|----------------------------------------------|---------------------------------|--------------------------------|---------------------------------|-------------------------|-------------------------------|---------------------------------------|
| Ala116Thr            | 21.3             | 6.3            | 5.6              | 45               | 17.7                                           | 0.1                                          | 17.2                            | 0.4                            | 804                             | 0                       | 741                           | 63                                    |
| Ile239Thr            | 17.9             | 6.6            | 6.4              | 38               | 42.3                                           | 0.1                                          | 3.8                             | 38.4                           | 1473                            | 0                       | 1374                          | 99                                    |
| Met342Val            | 24.3             | 4.2            | 5.5              | 70               | 31.7                                           | 6.3                                          | 17.9                            | 7.6                            | 571                             | 32                      | 468                           | 72                                    |
| Arg476Trp            | 20.2             | 5.7            | 6.1              | 38               | 40.8                                           | 0.2                                          | 15.1                            | 25.4                           | 1039                            | 1                       | 1037                          | 0                                     |
| X501Arg <sup>A</sup> | 19.0             | 7.6            | 4.9              | 41               | 26.6                                           | 0.1                                          | 5.1                             | 21.4                           | 1215                            | 0                       | 403                           | 812                                   |

|                |                             |                          |                          |                          |                             |                          |                           |                             |                                   |                               |                                   |                                |
|----------------|-----------------------------|--------------------------|--------------------------|--------------------------|-----------------------------|--------------------------|---------------------------|-----------------------------|-----------------------------------|-------------------------------|-----------------------------------|--------------------------------|
| WT<br>(n = 25) | 17.9 ± 3.0<br>(13.0 - 27.6) | 5.6 ± 1.3<br>(3.1 - 8.5) | 4.9 ± 1.3<br>(3.5 - 9.7) | 45.0 ± 10.4<br>(30 - 69) | 23.0 ± 16.1<br>(2.4 - 65.6) | 0.3 ± 0.7<br>(0.0 - 3.2) | 9.5 ± 7.2<br>(0.2 - 27.2) | 13.2 ± 15.3<br>(0.0 - 58.2) | 941.6 ± 294.9<br>(476.6 - 1719.3) | 14.3 ± 38.51<br>(0.0 - 141.3) | 676.5 ± 260.5<br>(265.8 - 1568.1) | 250.8 ± 242.4<br>(0.0 - 831.3) |
|----------------|-----------------------------|--------------------------|--------------------------|--------------------------|-----------------------------|--------------------------|---------------------------|-----------------------------|-----------------------------------|-------------------------------|-----------------------------------|--------------------------------|

| Variant              | Medium Small LDL Particles<br>nmol/L | Very Small LDL Particles<br>nmol/L | HDL Particles (total)<br>µmol/L | Large HDL Particles<br>µmol/L | Medium HDL Particles<br>µmol/L | Small HDL Particles<br>µmol/L | VLDL Size<br>nm | LDL Size<br>nm | HDL Size<br>nm | Triglyceride (total)<br>mg/dL | VLDL & Chylomicron Triglyceride (total)<br>mg/dL | HDL Cholesterol (total)<br>mg/dL |
|----------------------|--------------------------------------|------------------------------------|---------------------------------|-------------------------------|--------------------------------|-------------------------------|-----------------|----------------|----------------|-------------------------------|--------------------------------------------------|----------------------------------|
| Ala116Thr            | 6                                    | 57                                 | 43.9                            | 25                            | 2.9                            | 15.9                          | 50.9            | 22.4           | 10.3           | 75                            | 29                                               | 126                              |
| Ile239Thr            | 29                                   | 70                                 | 32.2                            | 20.4                          | 0                              | 11.8                          | 36.6            | 22.6           | 10.2           | 86                            | 30                                               | 90                               |
| Met342Val            | 21                                   | 51                                 | 56.5                            | 28.3                          | 3.7                            | 24.5                          | 68.2            | 22.4           | 9.8            | 129                           | 86                                               | 128                              |
| Arg476Trp            | 0                                    | 0                                  | 33.6                            | 20.1                          | 0                              | 13.5                          | 43.9            | 22.6           | 10.2           | 84                            | 38                                               | 95                               |
| X501Arg <sup>A</sup> | 338                                  | 474                                | 35.4                            | 19.9                          | 1.4                            | 14.1                          | 43.3            | 21.4           | 10.1           | 65                            | 21                                               | 96                               |

|                |                              |                                |                             |                             |                           |                            |                               |                             |                          |                               |                             |                                |
|----------------|------------------------------|--------------------------------|-----------------------------|-----------------------------|---------------------------|----------------------------|-------------------------------|-----------------------------|--------------------------|-------------------------------|-----------------------------|--------------------------------|
| WT<br>(n = 25) | 71.2 ± 80.5<br>(0.0 - 261.1) | 179.6 ± 183.1<br>(0.0 - 700.1) | 40.4 ± 9.1<br>(22.7 - 66.5) | 21.3 ± 3.4<br>(13.3 - 26.1) | 1.8 ± 4.3<br>(0.0 - 16.4) | 17.3 ± 7.6<br>(0.7 - 40.6) | 54.3 ± 15.6<br>(37.8 - 103.3) | 22.2 ± 0.5<br>(21.2 - 22.7) | 10.0 ± 0.3<br>(9.6-10.6) | 69.0 ± 21.5<br>(43.6 - 141.8) | 25.5 ± 13.6<br>(7.2 - 54.7) | 101.3 ± 13.1<br>(79.3 - 134.2) |
|----------------|------------------------------|--------------------------------|-----------------------------|-----------------------------|---------------------------|----------------------------|-------------------------------|-----------------------------|--------------------------|-------------------------------|-----------------------------|--------------------------------|

<sup>A</sup>The subject carrying the X501Arg variant also carries the Asn396Ser variant. Values with '±' are means ± SD. -, data unavailable. Numbers in parentheses are ranges.

Supplemental Table 3. Mean lipid and lipoprotein values by genotype.

|                                     |                                        | Thr111Ile (rs2000813) |                 |               | <i>P</i> <sup>D</sup> | Asn396Ser      |                |                      | <i>P</i> <sup>D</sup> |
|-------------------------------------|----------------------------------------|-----------------------|-----------------|---------------|-----------------------|----------------|----------------|----------------------|-----------------------|
|                                     |                                        | C/C                   | C/T             | T/T           |                       | A/A            | A/G            | G/G                  |                       |
|                                     |                                        | n                     | n               | n             |                       | n              | n              | n                    |                       |
| <b>FHS</b>                          | HDL-C <sup>A</sup>                     | 50.49 ± 13.53         | 50.68 ± 13.20   | 51.19 ± 14.91 | 0.92                  | 50.46 ± 13.47  | 58.76 ± 16.26  | -                    | 4 x 10 <sup>-5</sup>  |
|                                     |                                        | 798                   | 672             | 139           |                       | 1740           | 46             | 0                    |                       |
|                                     | HDL <sub>2</sub> <sup>B</sup>          | 7.49 ± 5.57           | 7.31 ± 5.20     | 7.70 ± 6.59   | 0.66                  | 7.34 ± 5.42    | 9.88 ± 7.06    | -                    | 0.03                  |
|                                     |                                        | 718                   | 616             | 124           |                       | 1572           | 42             | 0                    |                       |
|                                     | HDL <sub>3</sub> <sup>B</sup>          | 42.60 ± 10.80         | 42.58 ± 10.91   | 43.25 ± 12.06 | 0.82                  | 42.44 ± 10.84  | 49.03 ± 12.29  | -                    | 6 x 10 <sup>-4</sup>  |
|                                     |                                        | 673                   | 584             | 114           |                       | 1481           | 38             | 0                    |                       |
|                                     | HDL Size <sup>B</sup>                  | 9.18 ± 0.50           | 9.16 ± 0.46     | 9.20 ± 0.48   | 0.6                   | 9.17 ± 0.48    | 9.43 ± 0.51    | -                    | 8 x 10 <sup>-3</sup>  |
|                                     |                                        | 624                   | 527             | 110           |                       | 1356           | 35             | 0                    |                       |
|                                     | HDL small particle <sup>B</sup>        | 7.02 ± 4.95           | 7.07 ± 5.34     | 7.31 ± 4.78   | 0.45                  | 7.16 ± 5.09    | 6.03 ± 4.91    | -                    | 0.59                  |
|                                     |                                        | 624                   | 527             | 110           |                       | 1356           | 35             | 0                    |                       |
|                                     | HDL intermediate particle <sup>B</sup> | 20.99 ± 6.40          | 21.22 ± 6.85    | 20.28 ± 6.80  | 0.63                  | 21.00 ± 6.57   | 20.54 ± 7.70   | -                    | 0.74                  |
| 624                                 |                                        | 527                   | 110             | 1356          |                       | 35             | 0              |                      |                       |
| HDL large particle <sup>B</sup>     | 23.18 ± 16.93                          | 23.34 ± 17.03         | 23.93 ± 18.41   | 0.93          | 22.97 ± 16.97         | 34.31 ± 18.06  | -              | 4 x 10 <sup>-4</sup> |                       |
|                                     | 624                                    | 527                   | 110             |               | 1356                  | 35             | 0              |                      |                       |
| apoA-1 <sup>B</sup>                 | 143.28 ± 29.10                         | 144.33 ± 31.49        | 146.02 ± 30.29  | 0.62          | 143.17 ± 30.20        | 158.18 ± 40.67 | -              | 7 x 10 <sup>-3</sup> |                       |
|                                     | 677                                    | 579                   | 118             |               | 1480                  | 38             | 0              |                      |                       |
| Total Cholesterol <sup>A</sup>      | 204.15 ± 30.35                         | 203.22 ± 30.05        | 205.64 ± 31.06  | -             | 203.64 ± 29.99        | 209.60 ± 31.71 | -              | -                    |                       |
|                                     | 798                                    | 672                   | 139             |               | 1740                  | 46             | 0              |                      |                       |
| Triglycerides <sup>A</sup>          | 124.39 ± 72.90                         | 124.51 ± 72.92        | 135.41 ± 129.30 | 0.18          | 124.51 ± 77.42        | 120.97 ± 76.22 | -              | 0.79                 |                       |
|                                     | 798                                    | 672                   | 139             |               | 1740                  | 46             | 0              |                      |                       |
| LDL-C <sup>A</sup>                  | 129.25 ± 27.33                         | 128.17 ± 27.33        | 128.63 ± 27.98  | 0.72          | 128.81 ± 27.00        | 126.54 ± 30.83 | -              | 0.37                 |                       |
|                                     | 796                                    | 672                   | 139             |               | 1738                  | 46             | 0              |                      |                       |
| <b>NHS II/<br/>HPFS<sup>C</sup></b> | HDL-C                                  | 57.0 ± 16.87          | 56.5 ± 17.79    | 59.4 ± 19.33  | 0.18                  | 55.4 ± 19.54   | 64.6 ± 21.61   | -                    | 0.03                  |
|                                     |                                        | 716                   | 622             | 124           |                       | 1780           | 28             | 0                    |                       |
|                                     | Total Cholesterol                      | 215.9 ± 45.43         | 214.8 ± 44.73   | 213.5 ± 44.38 | 0.74                  | 212.3 ± 43.39  | 217.0 ± 45.40  | -                    | 0.14                  |
|                                     |                                        | 716                   | 622             | 124           |                       | 1780           | 28             | 0                    |                       |
| Triglycerides                       | 117.8 ± 88.58                          | 126.3 ± 98.42         | 118.3 ± 89.17   | 0.21          | 121.0 ± 89.15         | 91.9 ± 49.05   | -              | 0.19                 |                       |
|                                     | 501                                    | 424                   | 91              |               | 1146                  | 20             | 0              |                      |                       |
| LDL-C                               | 129.6 ± 36.00                          | 127.9 ± 36.33         | 124.41 ± 36.30  | 0.37          | 127.6 ± 35.10         | 128.0 ± 36.22  | -              | 0.36                 |                       |
|                                     | 716                                    | 622                   | 124             |               | 1780                  | 28             | 0              |                      |                       |
| <b>PennCATH<sup>C</sup></b>         | HDL-C                                  | -                     | -               | -             | -                     | 43.70 ± 12.96  | 48.71 ± 12.38  | -                    | 0.02                  |
|                                     |                                        | -                     | -               | -             |                       | 1267           | 41             | 0                    |                       |
|                                     | Total Cholesterol                      | -                     | -               | -             | -                     | 178.40 ± 41.41 | 184.70 ± 38.93 | -                    | -                     |
|                                     |                                        | -                     | -               | -             |                       | 1267           | 41             | 0                    |                       |
| Triglycerides                       | -                                      | -                     | -               | -             | 141.50 ± 103.2        | 128.40 ± 71.42 | -              | -                    |                       |
|                                     | -                                      | -                     | -               |               | 1267                  | 41             | 0              |                      |                       |
| LDL-C                               | -                                      | -                     | -               | -             | 107.40 ± 35.55        | 110.3 ± 30.71  | -              | -                    |                       |
|                                     | -                                      | -                     | -               |               | 1240                  | 41             | 0              |                      |                       |

<sup>A</sup>Unadjusted average of mean measurements across up to seven exams ± SD, <sup>B</sup>Unadjusted average of measurements from exam 4 ± SD, <sup>C</sup>Unadjusted average ± SD, <sup>D</sup>*P* from adjusted models as described in text, -, unavailable

Supplemental Table 4. IMT Analyses

| <b>Variant</b> | <b>Subclinical Atherosclerosis Measure</b> | <b>Phenotype Variable Name</b> | <b><math>\beta</math></b> | <b>n</b> | <b>P-value</b> |
|----------------|--------------------------------------------|--------------------------------|---------------------------|----------|----------------|
| Asn396Ser      | Maximum common carotid artery IMT          | RNKCARTOTCCAMAXAS6             | 0.16                      | 1653     | 0.26           |
| Asn396Ser      | Mean common carotid artery IMT             | RNKCARTOTCCAMEANAS6            | 0.16                      | 1653     | 0.10           |
| Asn396Ser      | Maximum internal carotid artery IMT        | RNKCARTOTICAMAXAS6             | 0.16                      | 1548     | 0.19           |
| Asn396Ser      | Mean internal carotid artery IMT           | RNKCARTOTICAMEANAS6            | 0.16                      | 1548     | 0.24           |
| Thr111Ile      | Maximum common carotid artery IMT          | RNKCARTOTCCAMAXAS6             | 0.04                      | 1494     | 0.94           |
| Thr111Ile      | Mean common carotid artery IMT             | RNKCARTOTCCAMEANAS6            | 0.04                      | 1494     | 0.82           |
| Thr111Ile      | Maximum internal carotid artery IMT        | RNKCARTOTICAMAXAS6             | 0.04                      | 1394     | 0.44           |
| Thr111Ile      | Mean internal carotid artery IMT           | RNKCARTOTICAMEANAS6            | 0.04                      | 1394     | 0.22           |

## Supplemental Figure 1. Evaluation of LD

Genotyping of downstream *LIPG* SNPs identified from reported GWAS analysis of HDL-C variants was performed in the HHDL (rs4939883), Penn HDL (rs4939883), and PennCATH (rs2156552) cohorts. HapMap (release 21) data and our genotyping data were used to estimate LD using the Haploview software. SNPs rs4939883 and rs2156552 are highly correlated with each other, but neither is well correlated with Thr111Ile (rs2000813) or Asn396Ser. Both  $D'$  and  $r^2$  estimates of LD are displayed.

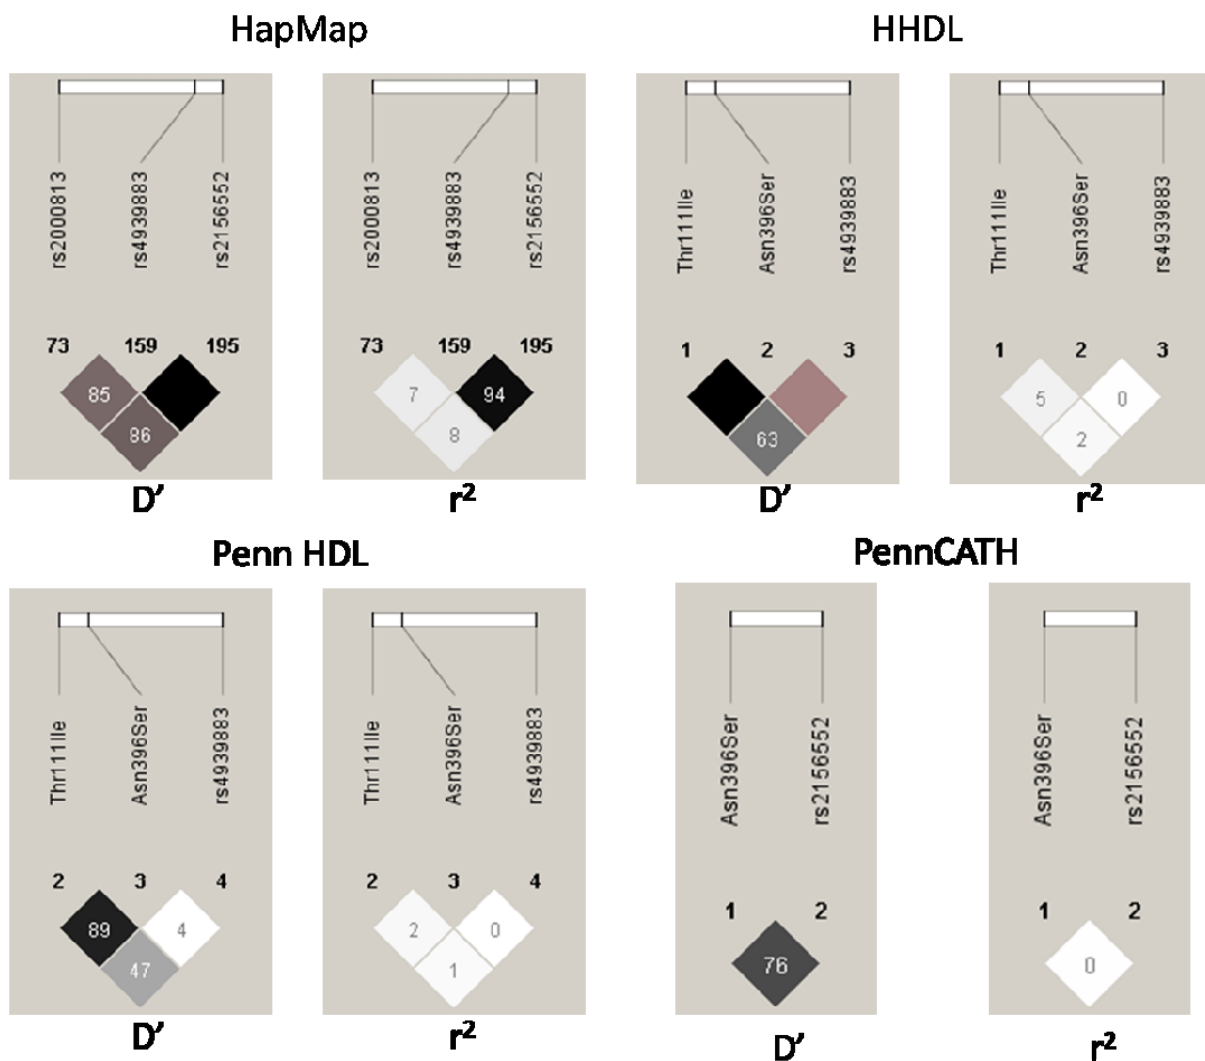

Supplement: JCI37176sd.pdf [file JCI37176sd.pdf]
